# Supplementary material
Source: MDPI journal article supplement (https://www.mdpi.com/search?q=nanomaterials-08-00318)
Supplement: s001 [file nanomaterials-08-00318-s001.pdf]

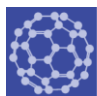

# High-Switching-Ratio Photodetectors Based on Perovskite $\text{CH}_3\text{NH}_3\text{PbI}_3$ Nanowires

Xin Zhang <sup>1,2</sup>, Caichi Liu <sup>1</sup>, Gang Ren <sup>1</sup>, Shiyun Li <sup>1</sup>, Chenghao Bi <sup>1</sup>, Qiuyan Hao <sup>1,\*</sup> and Hui Liu <sup>1,\*</sup>

<sup>1</sup> School of Materials Science and Engineering, Hebei University of Technology, Tianjin 300132, China; 18202669220@163.com (X.Z.); ccliu@hebut.edu.cn (C.L.); 18222902706@163.com (G.R.); 13682087532@163.com (S.L.); chenghao\_bi@163.com (C.B.)

<sup>2</sup> School of Xingtai Polytechnic College, Xingtai 054035, China

\* Correspondence: haoqiuyan@hebut.edu.cn (Q.H.); liuhuihebut@163.com (H.L.); Tel.: +86-22-265-8275 (Q.H. & H.L.)

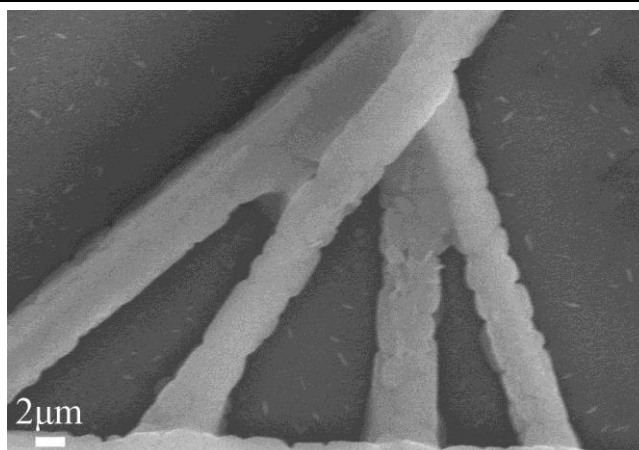

Figure S1. SEM images of perovskite  $\text{MAPbI}_3$  nanowires formed by self-assembly particles.

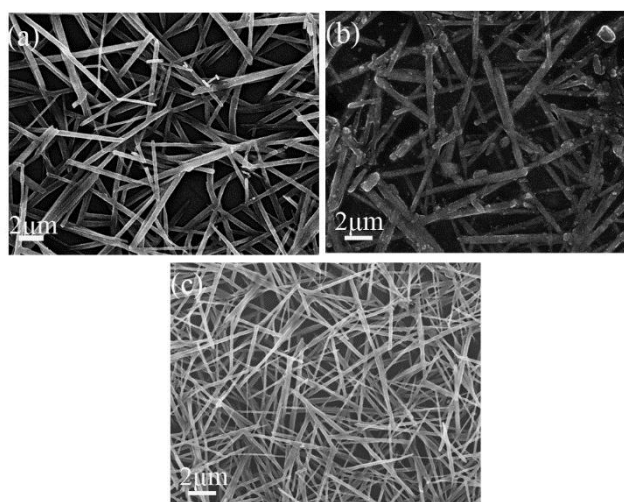

Figure S2. SEM images of perovskite  $\text{MAPbI}_3$  nanowires with DMF volume of (a) 15  $\mu\text{L}$ , (b) 10  $\mu\text{L}$ , (c) 5  $\mu\text{L}$ .

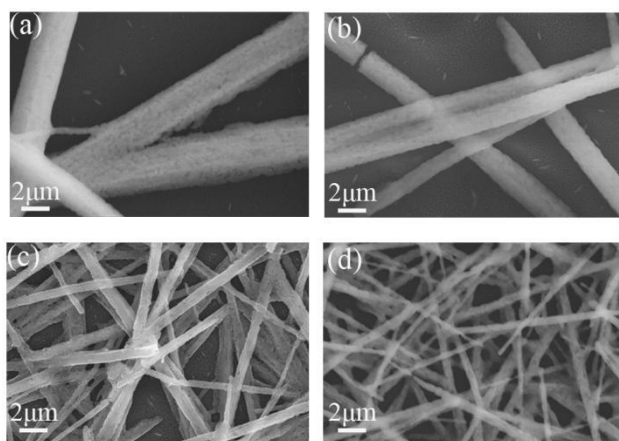

**Figure S3.** SEM images of perovskite MAPbI<sub>3</sub> nanowires with MAI concentration in IPA (a) 12.5 mg/5 mL, (b) 22.5 mg/5 mL, (c) 27.5 mg/5 mL, (d) 37.5 mg/5 mL.

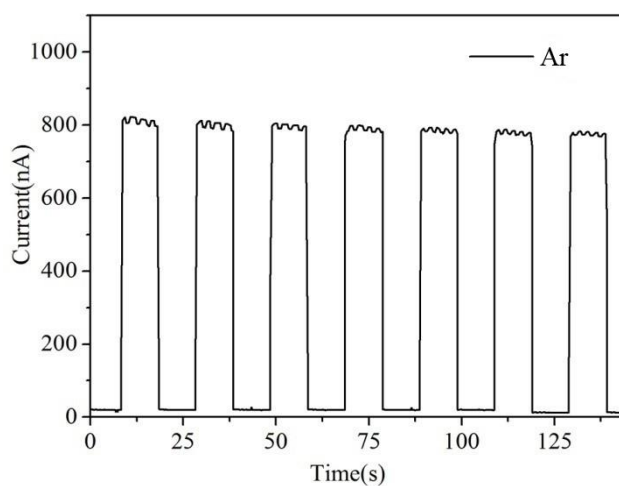

**Figure S4.** The I-t curves of devices fabricated under Ar and tested in inner atmosphere.

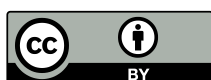

© 2018 by the authors. Licensee MDPI, Basel, Switzerland. This article is an open access article distributed under the terms and conditions of the Creative Commons Attribution (CC BY) license (<http://creativecommons.org/licenses/by/4.0/>).
